# Supplementary material for: Isolation and Identification of Inter-Species Enterovirus Recombinant Genomes
Source: MDPI journal article supplement (doi:10.3390/v13122390), 2021-11-29
Supplement: s1 [file s1]

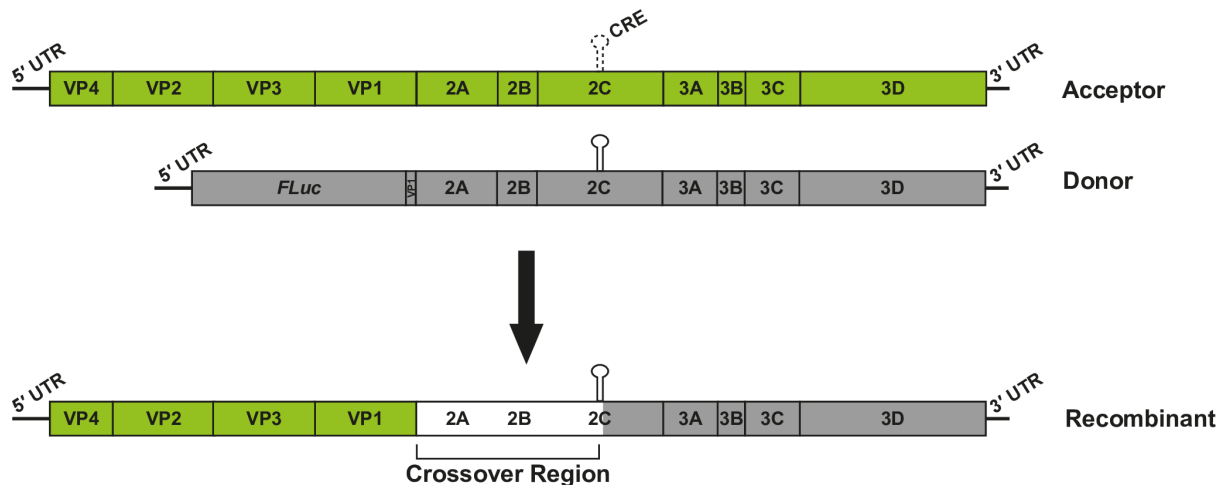

**Figure S1.** CRE-REP assay. A full-length acceptor RNA template containing mutations to the 2C CRE, which inhibit positive-strand synthesis, is co-transfected into permissive cells with a donor RNA template in which the structural genes have been replaced with a luciferase reporter gene. If recombination occurs within the crossover region viable recombinant viruses can be generated and isolated.
