# Supplementary material for: Isolation and Identification of Inter-Species Enterovirus Recombinant Genomes
Source: MDPI journal article supplement (doi:10.3390/v13122390), 2021-11-29
Supplement: s1 [file s1]

**Table S2.** Primer Sequences

| PCR                       | Primer                             | Sequence (5'-3')                         |
|---------------------------|------------------------------------|------------------------------------------|
| Recombinant amplification | EV71(F)                            | GTGCGAACTGTGGGTTTCATC                    |
|                           | EV71(R)                            | GTGGTACTTGTCTGCTATGGC                    |
|                           | E7(F)                              | CAAGCTGTACGCACGTCATG                     |
|                           | E7(R)                              | GTGTCTCTGGTGCAACACTG                     |
|                           | PV3(F)                             | GCAAACATCTTCCAACCCGTCC                   |
|                           | PV3(R)                             | TTGCTCTTGAAGTGTATGTAATTATTAATGG          |
|                           | PV1(R)                             | TTGCTCTTGAAGTGTATGTAGTTG                 |
|                           | EV68(F)                            | ATGCCATACATGAGCATTGC                     |
|                           | EV68(R)                            | TGAGGCTACTGATTTGCCAG                     |
|                           | EV70(R)                            | ATCAGGTGGGAGTGAGTAAG                     |
| EV61/PV1-1 cloning        | EV68_1(F)                          | TACGCTCCCGGGCTTTGTACGCCTGTTTTAATTCCCT    |
|                           | EV68_3642(R)                       | TCCGGTAAGACCTTTCGGTACCACCACAATCTCCTGCTTC |
|                           | PV1_2334(F)                        | GAAGCAGGAGATTGTGGTGGTACCGAAAGGTCTTACCGGA |
|                           | PV1_5105(R)                        | TGGACGGGGCATTATGATT                      |
| cDNA synthesis            | Oligo dT – for all positive strand | TTTTTTTTTTTTTTTT                         |
|                           | EV68(-) – for negative strand      | ACGTGGCGGCTAGTACTC                       |
