# Supplementary material for: Isolation and Identification of Inter-Species Enterovirus Recombinant Genomes
Source: MDPI journal article supplement (doi:10.3390/v13122390), 2021-11-29
Supplement: s1 [file s1]

**Table S1.** CRE-REP assays and isolations

| Donor    | Acceptor | Recombinant<br>Genomes <sup>a</sup> | Recombinant<br>Virus |
|----------|----------|-------------------------------------|----------------------|
| EV71/rep | EV71/CRE |                                     | X                    |
|          | E7/CRE   |                                     |                      |
|          | PV3/CRE  |                                     |                      |
|          | EV68/CRE |                                     |                      |
| E7/rep   | EV71/CRE | X                                   | X                    |
|          | E7/CRE   |                                     |                      |
|          | PV3/CRE  |                                     |                      |
|          | EV68/CRE | X                                   |                      |
| PV1/rep  | EV71/CRE |                                     | X                    |
|          | E7/CRE   | X                                   |                      |
|          | PV3/CRE  |                                     |                      |
|          | EV68/CRE | X                                   |                      |
| PV3/rep  | EV71/CRE |                                     | X                    |
|          | E7/CRE   | X                                   |                      |
|          | PV3/CRE  |                                     |                      |
|          | EV68/CRE |                                     |                      |
| EV70/rep | EV71/CRE |                                     |                      |
|          | E7/CRE   |                                     |                      |
|          | PV3/CRE  |                                     |                      |
|          | EV68/CRE | X                                   |                      |

<sup>a</sup> as determined by PCR analysis
