# Supplementary material for: Isolation and Identification of Inter-Species Enterovirus Recombinant Genomes
Source: MDPI journal article supplement (doi:10.3390/v13122390), 2021-11-29
Supplement: s1 [file s1]

**Table S3.** Quantitative analysis of EV68/PV1-1 PCR

| Construct                     | RNA strand | Time point | Area  | Mean      | Min   | Max   | Integrated Density | Raw Integrated Density | % change from 8 to 24h | Negative-strand (% total RNA) |
|-------------------------------|------------|------------|-------|-----------|-------|-------|--------------------|------------------------|------------------------|-------------------------------|
| <b>EV68/PV1-1 Replicate 1</b> | Positive   | 8h         | 0.072 | 32941.286 | 20966 | 64724 | 2376.801           | 153341687              |                        |                               |
|                               |            | 24h        | 0.072 | 26474.391 | 24536 | 31768 | 1910.197           | 123238289              | -20%                   |                               |
|                               | Negative   | 8h         | 0.072 | 18783.735 | 16682 | 21734 | 1355.296           | 87438288               |                        | 36%                           |
|                               |            | 24h        | 0.072 | 23303.048 | 21338 | 27265 | 1681.377           | 108475689              | 24%                    | 47%                           |
| <b>EV68/PV1-1 Replicate 2</b> | Positive   | 8h         | 0.072 | 37176.872 | 22405 | 64724 | 2682.41            | 173058339              |                        |                               |
|                               |            | 24h        | 0.072 | 26149.449 | 24270 | 31356 | 1886.752           | 121725687              | -30%                   |                               |
|                               | Negative   | 8h         | 0.072 | 20008.995 | 17821 | 24130 | 1443.702           | 93141874               |                        | 35%                           |
|                               |            | 24h        | 0.072 | 23301.075 | 20820 | 29442 | 1681.234           | 108466506              | 16%                    | 47%                           |
| <b>EV-D68</b>                 | Positive   | 8h         | 0.072 | 43115.732 | 21907 | 64724 | 3110.914           | 200703733              |                        |                               |
|                               |            | 24h        | 0.072 | 44269.077 | 18749 | 64724 | 3194.131           | 206072554              | 3%                     |                               |
|                               | Negative   | 8h         | 0.072 | 22454.473 | 18091 | 38862 | 1620.15            | 104525570              |                        | 34%                           |
|                               |            | 24h        | 0.072 | 28343.515 | 15661 | 64725 | 2045.06            | 131939063              | 26%                    | 39%                           |
