# Supplementary material for: Isolation and Identification of Inter-Species Enterovirus Recombinant Genomes
Source: Viruses. 2021 Nov 29;13(12):2390. doi: 10.3390/v13122390 (PMC8703282; doi:10.3390/v13122390)
Supplement: Supplementary file 1 [file viruses-13-02390-s001.zip]

Archive with 4 entries (4 files):
- Figure S1.pdf
- Table S1_Assays.pdf
- Table_S2_Primers.pdf
- Table_S3.pdf
